# Supplementary material
Source: Springer Nature journal article supplement (https://www.springermedizin.de/resource/supplementary/12957_2012_1524_MOESM3_ESM.pdf/9563220)

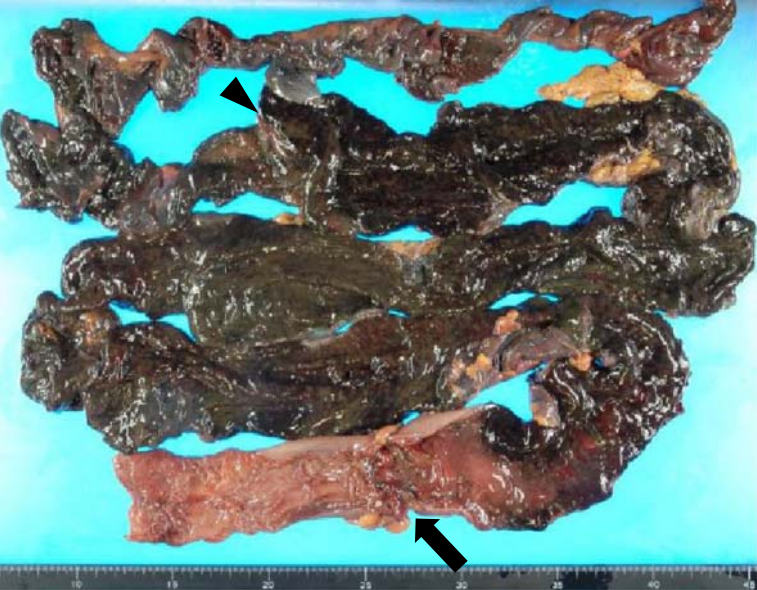

Supplement: MOESM3 [file 9563220]
